# Supplementary material
Source: Research Square preprint supplement (doi:10.21203/rs.3.rs-8627839/v1)
Supplement: Supplementary file 2 [file c220a1f46bce2b820fc5ea43.docx]

# **ESM 1: DAIRY FARMERS RESEARCH QUESTIONAIRE**

**INTRODUCTION**

My name is Sarah Muthoni Kabaya. I am a student pursuing a Master's degree in Environmental Science at Egerton University. I am conducting a research on ***‘*Impacts of land use, land cover changes and Sustainable land management practices on dairy farming in Baringo County.’** Regarding the study, I have a few questions for you. The supplied data will be treated with the utmost confidentiality and used only to investigate possible solutions to the present issue.

**Section A: Demographic Information**

1. Name (optional): ______________________
2. Gender: Male [ ] Female [ ]
3. Age:

18–35 [ ]

36–50 [ ]

51–64 [ ]

65 and above [ ]

1. Marital status;

Single ( ) Married ( ) Widow(er) ( ) Divorced ( )

1. Ward:

Mogotio [ ] Mumberes [ ]

1. Education Level:

No formal [ ]

Lower Primary [ ]

Primary [ ]

Secondary [ ]

Tertiary [ ]

1. Household size: __________ persons
2. Occupation _____________
3. Land size (acres) ­­­­­­­­­­­­­­­­­­­­­­­­­­­­­_____________
4. Land tenure:

Owned with title deed [ ]

Owned without title deed [ ]

Rented [ ]

Community owned [ ]

1. What is your monthly income?

**Section B: Dairy Farming Practices**

1. Years involved in dairy farming:

1 - 5 years [ ]

6 -10 years [ ]

11 - 15 years [ ]

16 - 20 years [ ]

21 - 25 years [ ]

26 - 30 years [ ]

31 years and above [ ]

1. What dairy farming system do you use?

Zero grazing [ ]

Semi-zero grazing [ ]

Open grazing (Free-range) [ ]

1. Number of lactating cows currently owned: ________
2. Average milk yield per cow per day (liters): ________
3. What type of cattle breed do you keep?

Indigenous [ ]

Crossbred [ ]

Friesian [ ]

Ayrshire [ ]

Jersey [ ]

Guernsey [ ]

1. What feeding methods do you use? *(Tick all that apply)*

Napier grass

Fodder trees/shrubs (e.g., Calliandra, Leucaena)

Crop residues

Dairy meal/supplements

Grazing on natural pasture

Silage

Hay

1. What change have you observed in milk yields over the past 13 years?

Increase [ ]
Decrease [ ]

No change [ ]

Please give reason for the change

1. Where do you sell milk?

Shops

Locally to neighbours

Hotels

Milk vendors

Cooperative societies

Do not sell

1. How much do you sell per litre of milk?
2. Do you belong to any farmer group?
3. What is your level of agreement with the following animal welfare practices in influencing milk production?

|  | **Strongly disagree** | **Disagree** | **Neutral** | **Agree** | **Strongly agree** |
| --- | --- | --- | --- | --- | --- |
| **Free from hunger** |  |  |  |  |  |
| **Free from thirst** |  |  |  |  |  |
| **Free from injury** |  |  |  |  |  |
| **Free from extreme weather (cold and heat stress)** |  |  |  |  |  |
| **Free from fear** |  |  |  |  |  |

1. What is your level of agreement with the following animal hygiene and health practices in influencing milk production?

|  | **Strongly disagree** | **Disagree** | **Neutral** | **Agree** | **Strongly agree** |
| --- | --- | --- | --- | --- | --- |
| **I harvest milk under hygienic conditions** |  |  |  |  |  |
| **I ensure good milking routines** |  |  |  |  |  |
| I use suitable and well-maintained equipment for milking and storage |  |  |  |  |  |

1. What is your level of agreement on the following animal nutrition practices in influencing milk production?

|  | **Strongly disagree** | **Disagree** | **Neutral** | **Agree** | **Strongly agree** |
| --- | --- | --- | --- | --- | --- |
| **I provide my cows with good quality feeds** |  |  |  |  |  |
| **I provide my cows with water supplies and feeds that are free from chemicals** |  |  |  |  |  |
| **I ensure adequate storage conditions of feeds to avoid contamination** |  |  |  |  |  |

1. To what extent do you agree with the following disease control factors in influencing milk yields?

|  | **Strongly disagree** | **Disagree** | **Neutral** | **Agree** | **Strongly agree** |
| --- | --- | --- | --- | --- | --- |
| **I ensure early detection of cow diseases** |  |  |  |  |  |
| **I ensure prevention of animal diseases** |  |  |  |  |  |
| **I follow correct treatment procedure when animals are sick** |  |  |  |  |  |

**Access to training and education**

1. What is your level of agreement on the following in influencing milk production?

|  | **Strongly disagree** | **Disagree** | **Neutral** | **Agree** | **Strongly agree** |
| --- | --- | --- | --- | --- | --- |
| I have high level of knowledge in dairy animal keeping |  |  |  |  |  |
| I have adequate access to training of dairy animal keeping |  |  |  |  |  |
| I have adequate access of funds |  |  |  |  |  |

**Section C: Land Use and Cover (LULC) Changes**

1. During the time you have practiced dairy farming in the area, have you observed any changes in:

| **Land Use Land Cover Change** | **Increased** | **Decreased** | **No change** | **Reasons for the change** |
| --- | --- | --- | --- | --- |
| Grazing lands |  |  |  |  |
| Forest cover |  |  |  |  |
| Settlement areas |  |  |  |  |
| Agricultural areas |  |  |  |  |
| Water bodies |  |  |  |  |
| Shrub lands |  |  |  |  |
| Bare land |  |  |  |  |

1. Have you been affected by any of the following? (Tick all that apply)

Land sub-division [ ]

Soil erosion [ ]

Encroachment on pasture land [ ]

Drought [ ]

Water scarcity [ ]

1. What do you think has caused the above changes? (rank top 3)

Population growth [ ]

Land tenure policy [ ]

Deforestation [ ]

Urbanization [ ]

Climate change [ ]

Other: __________

**Section D: Sustainable Land Management (SLM) Practices**

1. Are you aware of SLM practices?

Yes [ ]

No [ ]

If yes, which ones are you using? (tick all that apply)

Rotational grazing [ ]

Agroforestry [ ]

Fodder preservation [ ]

Terraces [ ]

Water harvesting [ ]

Mulching [ ]

Cover crops [ ]

i) List the type of trees planted in your farm:

_______________, ____________, ____________,____________

ii) What type of fodder do you preserve?

_______________, ____________, ____________,____________

iii). What type of crops have you planted?

_______________, ____________, ____________,____________

1. For how long have you used SLM practices? ­­­­­­­­­­­­­­­­­­­

1 year and below

2–5 years

6–10 years

11 years and above

1. What motivated you to adopt these SLM practices? *(Select all that apply)*

Increased milk production [ ]

Soil fertility improvement [ ]

Advice from extension officers/NGOs [ ]

Drought or poor yields [ ]

Training/workshops [ ]

Other (specify): _______________________

1. What challenges have you faced in adopting SLM practices? *(Select all that apply)*

Lack of knowledge and skills [ ]

High cost of SLM practices [ ]

Land size [ ]

Labor shortage [ ]

Drought and famine [ ]

Cultural hindrances [ ]

Other: ______

1. What is your level of agreement on influence of the following SLM influence on milk yield?

|  | Strongly disagree | Disagree | Neutral | Agree | Strongly agree |
| --- | --- | --- | --- | --- | --- |
| Rotational grazing |  |  |  |  |  |
| Agroforestry |  |  |  |  |  |
| Fodder preservation |  |  |  |  |  |
| Terraces |  |  |  |  |  |
| Water harvesting |  |  |  |  |  |
| Mulching |  |  |  |  |  |
| Cover crops |  |  |  |  |  |

1. In your opinion, has the adoption of any of the SLM practices led to a change in milk production?
   Yes [ ]

No [ ]

If yes, how has milk production changed?

Increased [ ]

Decreased [ ]

1. Which SLM practice(s) do you believe contributed most to changes in milk yield?

Rotational grazing [ ]

Agroforestry [ ]

Fodder preservation [ ]

Terraces [ ]

Water harvesting [ ]

Mulching [ ]

Cover crops

1. Please estimate your **average daily milk yield (in litres)**

a) Before adopting SLM practices: ______

b) After adopting SLM practices: ______

### **Extension and Support**

1. Have you received any training or extension support on SLM practices?

Yes [ ]

No [ ]

1. If yes, who provided the training? (Tick all that apply)

Government extension officer

NGO

Farmer group

Private company

Veterinary officer

Higher institutions eg university, training institutes

Cooperative extension officers

1. Do you keep records of milk production on your farm?
   Yes [ ]

No [ ]

**Section E: Water Access**

1. What is your primary water source for livestock?
2. River [ ]
3. Borehole [ ]
4. Rainwater harvesting [ ]
5. Water pans [ ]
6. Piped [ ]
7. Dam [ ]
8. Shallow wells
9. What is the change in water availability for your livestock in recent years?

Increased [ ]

Decreased [ ]

No change [ ]

-- Please explain the reasons for the change

__________________________________
