# Supplementary material
Source: Research Square preprint supplement (doi:10.21203/rs.3.rs-8627839/v1)

**ESM 2: CRONBACH ALPHA TEST RESULTS**


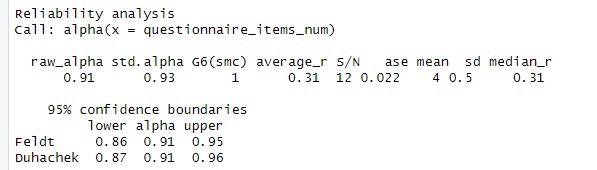

Supplement: Supplementary file 1 [file 3290b388a39c8c5b55aadf2c.docx]

## ESM 3: MULTIPLE LINEAR MODEL REGRESSION RESULTS


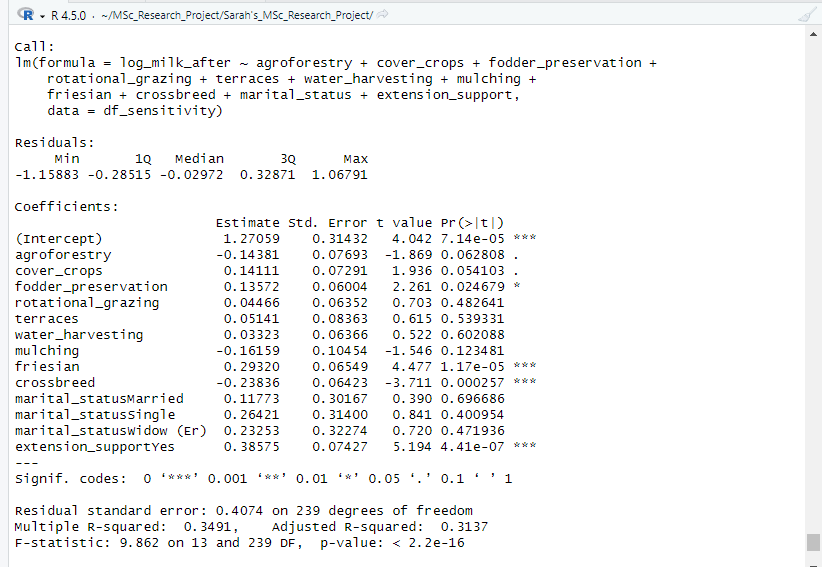

Supplement: Supplementary file 3 [file cdf1745f472202a53fffe45f.docx]
